# Supplementary material for: Genetic Diversity and Local Connectivity in the Mediterranean Red Gorgonian Coral after Mass Mortality Events
Source: PLoS One. 2016 Mar 16;11(3):e0150590. doi: 10.1371/journal.pone.0150590 (PMC4794161; doi:10.1371/journal.pone.0150590)
Supplement: S1 Table — The allele sizes in 10 loci studied in 6 P. clavata populations in the Ligurian Sea. (XLSX) [file pone.0150590.s003.xlsx]

## Sheet: Sheet1
population	Par a		Par cla 12		Par m		Par_d		Parcla_10		Parcla_14		Parcla_9		Par_b		Par_f		Parcla_17
PMes1	173	173	122	132	217	217	356	356	217	237	167	167	107	111	159	159	000	000	170	172
PMes1	173	173	122	132	184	184	356	356	217	217	167	185	105	105	159	159	000	000	170	170
PMes1	173	173	106	122	220	220	353	353	205	231	185	185	105	111	159	159	256	256	170	174
PMes1	000	000	106	106	184	217	338	356	199	217	185	185	093	107	159	159	256	256	170	172
PMes1	173	173	106	122	217	325	353	353	199	217	185	185	107	111	159	159	256	256	170	174
PMes1	173	173	106	132	217	319	338	353	205	217	167	185	093	105	159	159	250	256	170	174
PMes1	173	173	106	106	313	313	356	356	205	217	167	185	093	097	159	159	256	256	170	172
PMes1	173	173	106	106	313	313	356	356	205	217	167	185	093	097	159	159	256	256	170	172
PMes1	158	173	132	132	298	325	338	356	205	217	167	167	000	000	159	159	000	000	170	170
PMes1	173	173	106	106	193	193	353	356	205	211	177	177	093	105	159	159	256	256	170	172
PMes1	194	194	106	106	325	325	353	356	199	237	167	185	107	111	159	159	256	256	170	174
PMes1	173	173	106	122	298	298	356	356	205	205	181	185	107	107	000	000	000	000	170	170
PMes1	161	161	106	122	298	298	338	338	205	239	181	185	107	107	159	159	256	256	170	172
PMes1	173	173	128	128	298	298	353	353	205	211	177	185	105	107	159	159	256	256	170	170
PMes1	173	173	128	128	298	298	353	353	205	211	177	185	105	107	159	159	256	256	170	170
PMes1	173	194	128	132	187	193	338	353	199	217	181	181	105	111	150	159	250	256	170	170
PMes1	173	173	106	106	187	298	338	338	199	217	167	177	097	105	159	159	256	256	170	170
PMes1	173	173	106	106	187	187	353	353	000	000	000	000	105	111	000	000	000	000	170	170
PMes1	161	173	106	106	187	298	353	356	199	217	177	181	107	107	159	159	000	000	170	170
PMes1	158	173	106	106	187	298	356	356	199	207	167	181	111	111	000	000	000	000	170	170
PMes1	173	185	106	106	184	184	000	000	000	000	000	000	097	111	153	153	000	000	170	170
PMes1	161	167	106	106	298	298	338	353	215	217	167	185	093	105	159	159	000	000	170	174
PMes1	173	191	106	106	190	298	353	353	215	217	181	181	105	111	159	159	256	256	170	178
PMes1	158	173	116	132	220	313	356	356	199	237	185	185	101	111	000	000	000	000	170	174
PMes1	161	161	100	100	220	298	000	000	201	215	167	167	093	093	000	000	000	000	170	178
PMes1	161	191	106	116	190	190	000	000	000	000	167	167	105	111	000	000	000	000	170	178
PMes1	158	191	100	106	190	313	000	000	199	205	167	185	107	111	000	000	000	000	170	170
PMes1	161	173	106	106	307	307	338	338	215	237	167	167	107	107	159	159	256	256	170	172
PMes1	161	173	106	132	298	298	338	353	199	205	177	185	105	111	159	159	256	256	170	170
PMes1	161	173	106	122	313	313	338	356	217	237	185	185	111	111	000	000	000	000	170	178
PMes2	173	173	128	132	298	337	350	353	235	237	189	189	105	111	159	159	000	000	170	170
PMes2	173	194	106	108	184	184	000	000	199	205	167	167	093	107	000	000	256	256	170	170
PMes2	173	173	106	106	184	220	000	000	205	205	167	185	101	105	159	159	000	000	170	170
PMes2	173	173	106	106	298	298	350	356	205	217	177	195	105	111	000	000	256	256	170	174
PMes2	173	173	106	116	301	301	338	356	205	241	185	215	093	105	159	159	256	256	170	174
PMes2	173	191	106	106	190	190	350	353	199	239	185	185	101	109	000	000	256	256	170	170
PMes2	173	173	106	132	331	331	338	353	205	237	185	185	101	111	150	159	250	256	172	174
PMes2	176	194	122	132	298	334	350	356	211	221	167	185	097	109	159	159	256	256	170	174
PMes2	173	173	106	116	331	331	000	000	199	215	167	177	111	111	000	000	000	000	170	170
PMes2	173	194	106	122	184	184	338	338	205	217	167	185	097	107	159	159	256	256	170	170
PMes2	173	173	132	132	319	319	350	350	205	205	167	181	105	111	000	000	256	256	170	172
PMes2	173	173	106	106	175	175	353	356	217	229	185	185	107	107	150	150	256	256	170	172
PMes2	161	161	106	106	223	298	353	353	237	237	211	211	105	107	159	159	256	256	170	170
PMes2	164	173	106	122	307	307	356	356	217	219	185	185	111	111	000	000	256	256	170	170
PMes2	176	176	106	108	175	175	338	356	199	205	185	185	111	111	000	000	000	000	170	170
PMes2	173	185	106	106	184	184	350	356	199	237	185	189	105	111	000	000	256	256	170	170
PMes2	161	173	102	106	298	298	353	356	199	205	185	189	105	111	000	000	256	256	170	170
PMes2	158	173	106	106	000	000	356	356	199	199	185	185	111	111	159	159	256	256	170	172
PMes2	173	176	106	106	313	313	356	356	237	237	185	189	093	107	000	000	250	256	170	170
PMes2	158	194	116	124	193	298	338	356	225	229	181	185	097	107	000	000	000	000	170	170
PMes2	158	161	106	106	298	298	338	338	199	199	177	181	105	111	000	000	000	000	170	174
PMes2	173	173	106	106	289	289	356	356	217	239	177	185	105	105	150	159	256	256	172	178
PMes2	161	173	116	132	217	319	353	356	237	241	167	215	105	111	159	159	250	256	170	170
PMes2	173	173	102	106	313	313	356	356	205	237	185	185	105	109	159	159	250	256	170	174
PMes2	173	173	106	106	000	000	338	338	199	205	167	167	000	000	159	159	256	256	172	174
PMes2	173	191	106	132	190	292	338	353	199	199	185	195	101	105	000	000	256	256	170	174
PMes2	173	191	106	132	190	292	338	353	199	199	185	195	101	105	000	000	256	256	170	174
PMes2	173	191	106	106	190	289	353	353	215	221	167	177	105	111	159	159	256	256	170	170
PMes2	173	176	106	106	184	298	338	356	199	241	167	185	105	107	159	159	256	256	170	172
PMes2	173	173	106	116	301	301	338	338	199	199	167	215	093	111	159	159	256	256	170	174
LaSp3	000	000	102	102	316	316	338	356	217	231	177	185	097	113	159	159	250	256	170	178
LaSp3	158	173	108	132	190	319	356	356	205	207	167	185	107	111	159	159	250	250	170	174
LaSp3	173	173	102	132	193	193	338	353	207	237	183	185	111	111	159	159	000	000	170	174
LaSp3	173	173	106	106	310	331	338	353	207	211	185	187	111	111	159	159	250	252	170	170
LaSp3	173	173	132	132	319	319	338	356	211	211	185	185	111	111	159	159	250	250	170	178
LaSp3	173	173	108	124	190	319	338	356	205	205	181	185	111	111	159	159	250	256	174	178
LaSp3	158	173	102	108	193	319	338	356	205	231	167	177	107	111	159	159	000	000	170	170
LaSp3	158	173	108	108	193	319	338	353	205	211	185	207	105	105	159	159	250	252	170	172
LaSp3	173	173	128	132	310	331	356	356	211	213	177	185	107	107	159	159	252	256	170	174
LaSp3	170	170	102	132	217	217	338	338	205	211	177	185	107	111	159	159	250	250	170	170
LaSp3	158	173	108	118	190	211	338	356	211	211	185	185	107	107	159	159	250	252	170	170
LaSp3	173	173	106	108	193	313	356	356	205	239	185	185	107	107	159	159	256	256	170	174
LaSp3	173	185	132	134	184	310	356	356	207	217	179	185	111	111	159	159	250	252	170	170
LaSp3	173	173	106	106	184	184	356	356	211	239	185	185	107	107	159	159	000	000	170	170
LaSp3	158	158	108	132	319	319	338	356	205	239	167	185	107	111	159	159	250	256	170	170
LaSp3	158	158	106	108	316	316	338	338	205	217	181	185	107	111	159	159	250	256	170	170
LaSp3	173	173	106	108	313	319	356	356	217	239	167	185	107	107	159	159	250	256	170	174
LaSp3	000	000	108	132	193	211	353	353	205	211	185	185	105	109	159	159	250	252	170	170
LaSp3	173	173	108	108	211	229	356	356	217	217	177	179	107	107	159	159	252	256	170	170
LaSp3	173	173	110	122	190	217	338	356	205	211	177	185	109	111	000	000	250	256	172	178
LaSp3	158	158	132	134	217	217	338	338	217	237	181	185	107	111	000	000	250	256	170	170
LaSp3	173	173	108	108	000	000	356	356	207	231	177	177	105	111	000	000	000	000	174	174
LaSp3	173	173	106	122	000	000	356	356	213	217	177	177	097	111	000	000	250	250	170	170
LaSp3	173	173	126	126	298	310	338	350	211	231	177	185	107	111	159	159	250	256	170	170
LaSp3	173	173	106	108	193	193	338	356	207	211	177	185	105	111	159	159	000	000	178	178
LaSp3	158	173	108	118	214	331	338	338	211	217	177	181	107	111	159	159	000	000	170	170
LaSp3	000	000	106	108	298	298	338	356	207	231	177	185	105	105	159	159	250	256	170	178
LaSp3	158	158	000	000	298	331	338	338	211	237	177	185	105	107	150	159	252	256	170	174
LaSp3	173	173	118	132	298	331	356	356	207	217	185	185	093	097	000	000	250	256	170	174
LaSp5	158	158	106	126	193	217	338	356	205	221	167	167	105	111	159	159	250	256	172	172
LaSp5	173	173	132	132	319	337	000	000	221	231	185	189	107	111	159	159	256	256	170	170
LaSp5	158	158	102	102	295	295	356	356	217	237	183	185	107	111	159	159	250	256	170	170
LaSp5	173	173	102	106	193	193	356	356	211	231	177	183	105	109	159	159	250	250	170	170
LaSp5	194	194	110	132	331	331	356	356	211	233	185	185	093	105	159	159	250	256	170	170
LaSp5	173	173	130	132	337	337	356	356	207	221	185	189	111	111	159	159	250	256	170	170
LaSp5	173	173	108	132	217	298	338	338	207	231	167	185	107	111	159	159	250	250	174	178
LaSp5	173	173	106	110	337	337	356	356	211	231	183	185	105	105	159	159	250	250	170	170
LaSp5	158	158	132	132	217	217	338	338	199	207	177	191	093	111	150	159	256	256	170	174
LaSp5	173	173	132	132	310	310	338	338	217	231	167	185	107	107	000	000	250	250	170	178
LaSp5	000	000	108	122	310	331	338	338	211	211	185	185	111	111	159	159	250	250	170	178
LaSp5	173	194	118	128	298	331	000	000	199	211	181	191	107	111	159	159	256	256	170	170
LaSp5	173	173	132	132	223	223	353	356	199	211	167	185	097	111	159	159	256	256	170	178
LaSp5	173	173	118	132	331	331	338	356	199	205	185	185	111	111	159	159	250	250	170	178
LaSp5	173	173	102	110	331	331	353	356	211	211	177	177	107	111	159	159	256	256	174	178
LaSp5	173	173	102	110	331	331	353	356	211	211	177	177	107	111	159	159	256	256	174	178
LaSp5	173	173	118	118	000	000	000	000	211	217	185	185	097	111	159	159	000	000	170	170
LaSp5	173	173	102	102	190	190	338	338	205	237	167	185	107	111	159	159	250	256	170	172
LaSp5	173	173	118	132	193	193	000	000	205	211	185	189	111	115	159	159	250	250	170	178
LaSp5	170	170	106	132	193	217	356	356	207	207	167	185	111	111	159	159	250	250	170	170
LaSp5	158	173	118	132	217	217	338	338	199	211	181	185	105	111	000	000	000	000	170	178
LaSp5	173	173	116	132	217	316	356	356	217	231	177	181	105	105	000	000	250	250	170	174
LaSp5	173	173	000	000	217	331	356	356	205	211	181	185	105	107	000	000	250	256	170	174
LaSp5	000	000	132	132	331	331	338	338	217	217	177	185	093	093	000	000	250	256	174	174
LaSp5	161	161	116	136	331	331	356	356	205	217	191	211	105	107	000	000	256	256	172	178
LaSp5	173	194	130	132	000	000	338	356	211	237	167	177	107	111	000	000	000	000	178	178
LaSp5	000	000	000	000	000	000	000	000	000	000	000	000	000	000	000	000	000	000	170	170
LaSp5	158	173	116	132	217	217	338	338	199	217	185	185	105	105	000	000	000	000	178	178
LaSp5	173	173	106	110	310	310	356	356	221	237	177	181	101	105	000	000	000	000	170	178
LaSp5	173	173	110	132	193	193	338	338	205	231	167	181	107	107	000	000	000	000	170	170
Liv5	158	197	102	102	193	193	356	356	199	199	167	167	097	111	159	159	250	262	182	188
Liv5	158	197	106	106	000	000	356	356	199	207	167	177	109	109	000	000	000	000	174	174
Liv5	158	158	106	106	193	199	356	356	215	227	167	197	109	115	159	159	256	262	170	178
Liv5	158	194	102	102	193	319	353	353	215	217	181	203	097	101	159	159	250	256	170	178
Liv5	158	158	000	000	193	199	353	356	199	215	167	167	115	117	150	159	256	262	170	178
Liv5	158	203	102	118	193	193	356	356	199	217	167	177	101	117	159	159	250	250	170	174
Liv5	185	197	116	116	193	193	353	356	199	199	171	207	109	109	159	159	256	256	174	174
Liv5	158	197	102	102	193	193	356	356	199	199	167	167	097	111	159	159	250	262	182	188
Liv5	158	182	102	106	193	193	356	356	199	205	181	209	117	117	159	159	250	250	170	188
Liv5	191	197	118	118	193	193	353	356	199	241	167	177	111	111	159	159	250	256	182	188
Liv5	000	000	102	102	193	193	353	356	217	217	167	209	109	109	159	159	256	256	174	174
Liv5	182	194	102	102	193	193	353	356	217	217	167	207	109	109	159	159	250	256	170	170
Liv5	182	197	102	102	193	193	000	000	215	217	177	209	109	109	150	159	250	262	174	182
Liv5	158	203	102	134	193	193	356	356	205	217	167	207	097	109	150	159	256	262	174	182
Liv5	158	185	118	118	000	000	353	353	199	205	167	205	109	109	159	159	000	000	170	174
Liv5	167	167	102	102	190	190	356	356	207	217	167	181	109	111	159	165	250	256	174	182
Liv5	158	158	102	106	000	000	338	356	199	217	167	207	117	117	150	159	250	262	174	182
Liv5	158	197	104	104	193	193	353	356	217	217	167	203	109	121	000	000	250	256	170	172
Liv5	197	197	102	106	187	319	353	356	217	231	167	203	111	113	159	159	256	262	182	182
Liv5	158	158	000	000	322	322	356	356	199	213	177	209	109	121	159	159	250	256	170	182
Liv5	158	158	100	100	322	322	353	353	205	217	181	205	097	113	000	000	250	256	170	174
Liv5	158	158	000	000	190	190	356	356	199	199	177	205	109	111	000	000	256	256	172	174
Liv5	158	197	110	110	193	322	353	356	199	215	171	207	109	109	000	000	250	256	174	182
Liv5	158	197	106	106	000	000	353	356	199	217	177	203	109	109	000	000	250	256	170	188
Liv5	158	197	102	102	184	184	356	356	207	227	167	209	101	109	000	000	250	250	170	182
Liv6	158	158	108	108	322	322	356	356	199	209	177	177	097	109	150	159	250	250	170	174
Liv6	158	158	102	102	000	000	353	356	199	199	167	209	097	097	150	159	262	262	182	182
Liv6	000	000	102	102	193	193	000	000	000	000	000	000	000	000	150	159	250	262	170	174
Liv6	158	158	108	108	000	000	350	353	199	217	167	207	117	117	159	159	250	256	174	182
Liv6	158	167	108	108	193	319	353	356	217	217	177	179	109	121	000	000	256	256	174	188
Liv6	158	158	108	108	190	193	353	353	215	217	167	167	113	113	159	159	250	256	174	178
Liv6	158	194	102	102	193	193	356	356	199	217	167	167	111	119	150	159	250	256	170	174
Liv6	158	197	108	108	193	322	356	356	199	233	193	209	117	117	159	165	256	262	170	182
Liv6	167	173	000	000	193	319	353	353	217	217	167	181	113	113	150	159	250	256	174	174
Liv6	194	197	102	102	000	000	353	356	217	217	207	209	097	109	159	165	256	256	174	174
Liv6	158	197	100	100	000	000	356	356	199	217	181	207	109	109	150	159	250	250	174	178
Liv6	158	158	108	108	193	193	356	356	199	237	173	181	117	121	159	159	250	256	170	170
Liv6	185	185	102	102	193	193	353	356	199	205	167	167	101	101	159	159	250	250	182	182
Liv6	194	197	104	104	193	193	356	356	221	231	167	181	109	109	150	159	250	250	174	174
Liv6	194	197	108	108	220	220	356	356	209	231	167	167	097	109	150	159	250	250	170	174
Liv6	158	197	108	108	319	319	356	356	199	217	167	177	109	111	159	159	250	256	170	174
Liv6	158	197	108	108	322	322	356	356	199	217	167	177	109	111	159	159	250	256	170	174
Liv6	185	197	104	104	193	193	353	353	199	221	167	207	109	113	159	165	250	262	174	182
Liv6	158	182	106	106	199	319	353	356	199	217	167	167	097	109	150	159	250	250	174	174
Liv6	185	197	106	106	193	319	353	356	199	217	167	167	109	109	159	159	256	256	170	174
Liv6	182	197	100	106	193	193	353	353	199	217	167	173	109	109	159	159	250	250	182	188
Liv6	197	197	100	100	199	322	356	356	199	207	167	177	109	111	159	159	250	256	170	188
Liv6	197	203	134	156	000	000	353	356	199	211	207	207	097	097	159	159	250	256	182	188
Liv6	158	197	102	102	193	193	356	356	205	217	177	209	109	109	159	159	256	262	174	174
Liv6	167	197	134	134	322	322	353	353	199	221	167	193	109	109	150	159	250	256	170	188
Liv6	158	182	102	130	193	319	356	356	217	217	181	181	109	121	150	159	256	262	174	174
Liv6	197	203	100	110	322	322	356	356	237	237	177	191	109	113	150	159	250	256	174	174
Liv6	158	194	000	000	193	193	353	356	205	217	177	203	097	097	159	159	250	256	170	170
Liv6	197	203	106	106	193	193	353	356	199	199	207	207	097	109	159	159	250	250	174	188
Liv6	197	203	104	134	193	322	353	356	199	217	207	209	097	109	159	159	250	250	170	188
